# Supplementary material for: Identification of cancer prognosis-associated lncRNAs based on the miRNA-TF co-regulatory motifs and dosage sensitivity
Source: Royal Society of Chemistry journal article supplement (doi:10.1039/c9mo00089e), 2019-08-27
Supplement: c9mo00089e1.pdf [file c9mo00089e1.pdf]

## Supplementary Figures

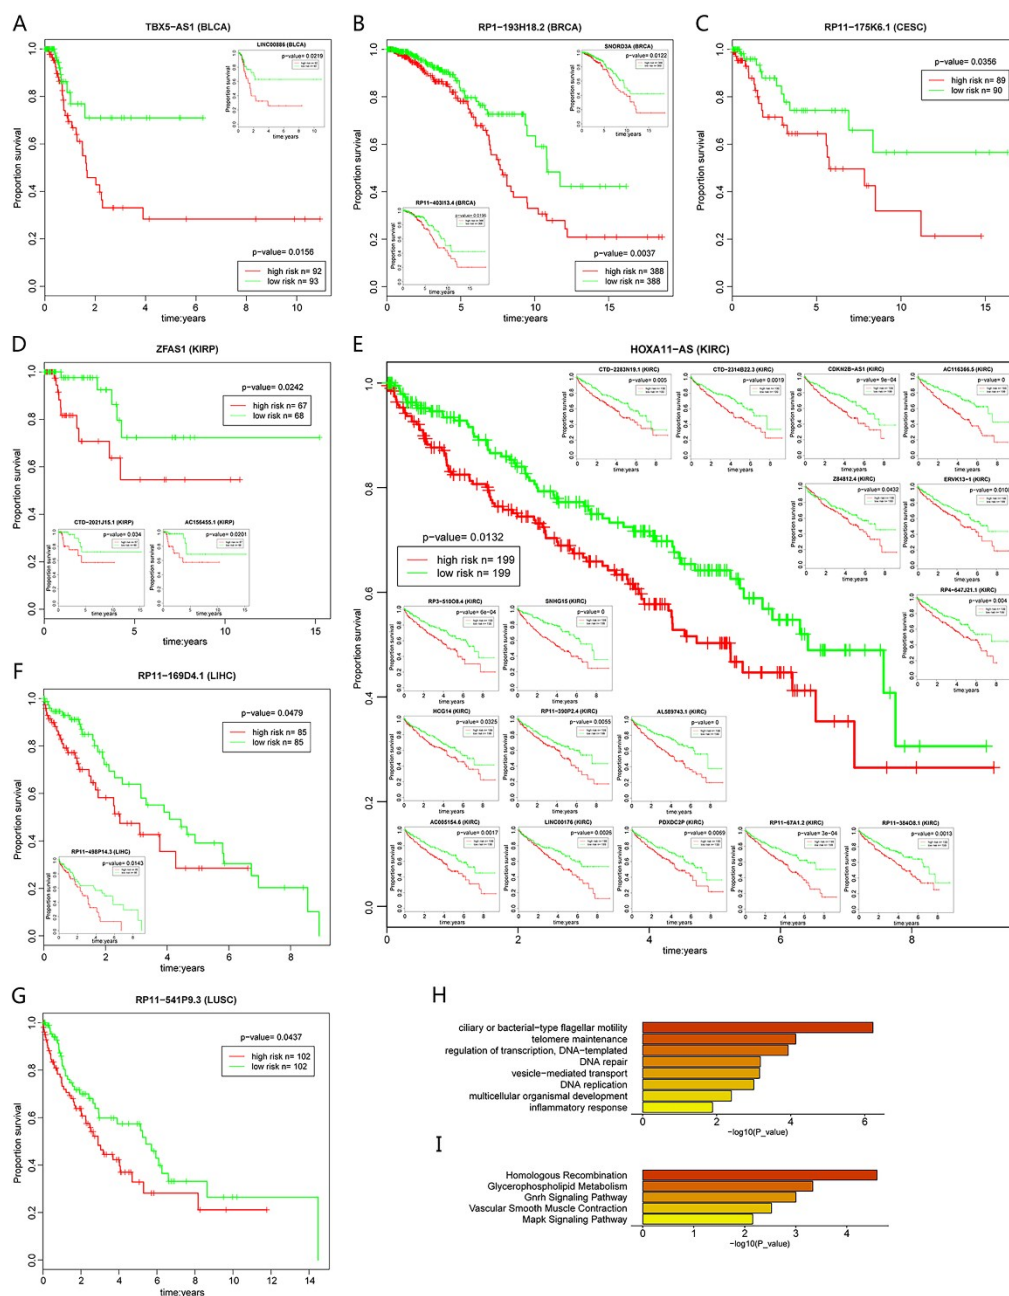

**Fig. S1. Survival analysis of lncRNAs.** The red line represents the high-risk group and the green line represents the low-risk group. Samples with low risk were found to have longer survival. (A-G) Survival results of the remaining 30 lncRNAs in 8 cancer types. (H-I) Functional annotation and pathway enrichment of lncRNA SNHG15.

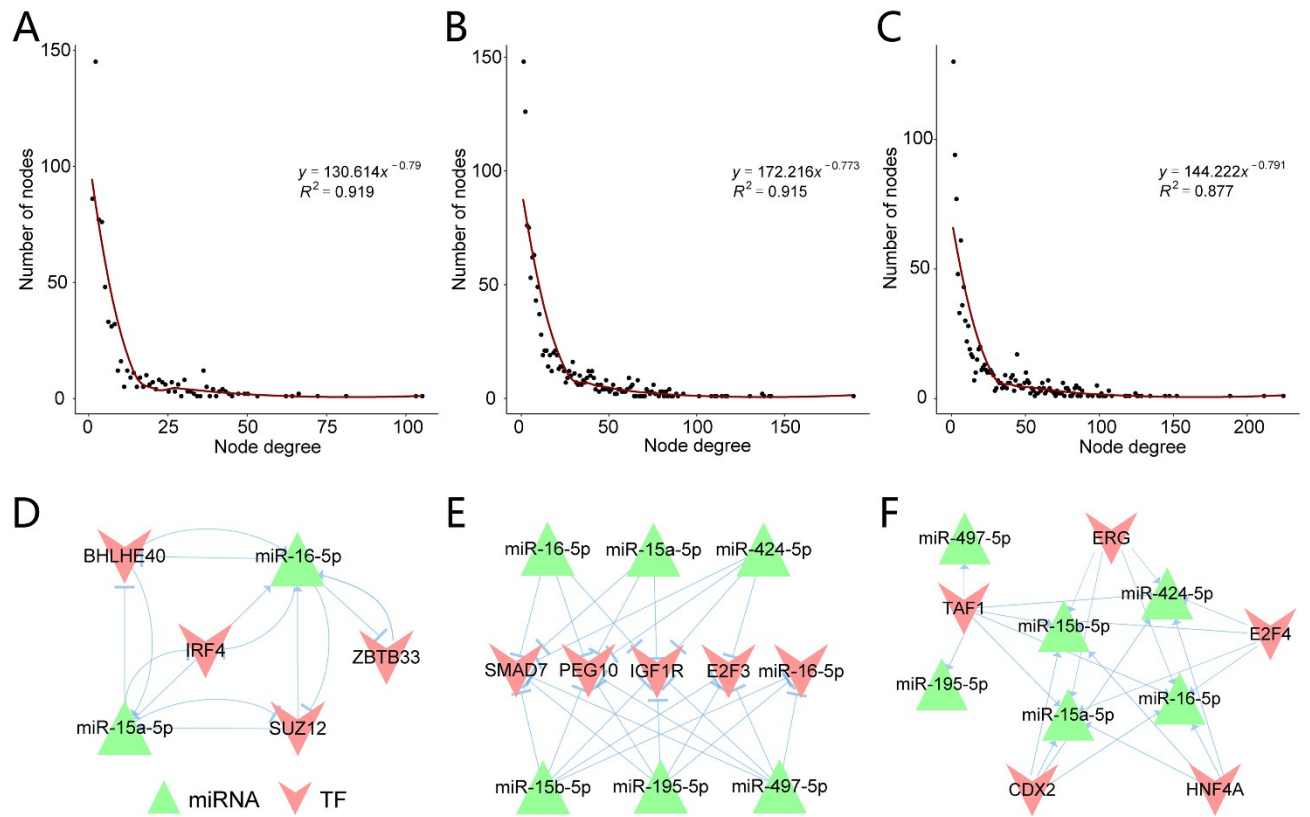

**Fig. S2. Network characteristics.** (A-C) The node degree distribution of the co-regulatory network involving motif M1(A), M2(B) and M3(C), respectively. The x-axis indicates degree of node, and the y-axis indicates the frequency of nodes on the basis of the x-axis. (D-F) The hub-networks constructed by hub elements of motif M1(D), M2(E) and M3(F).

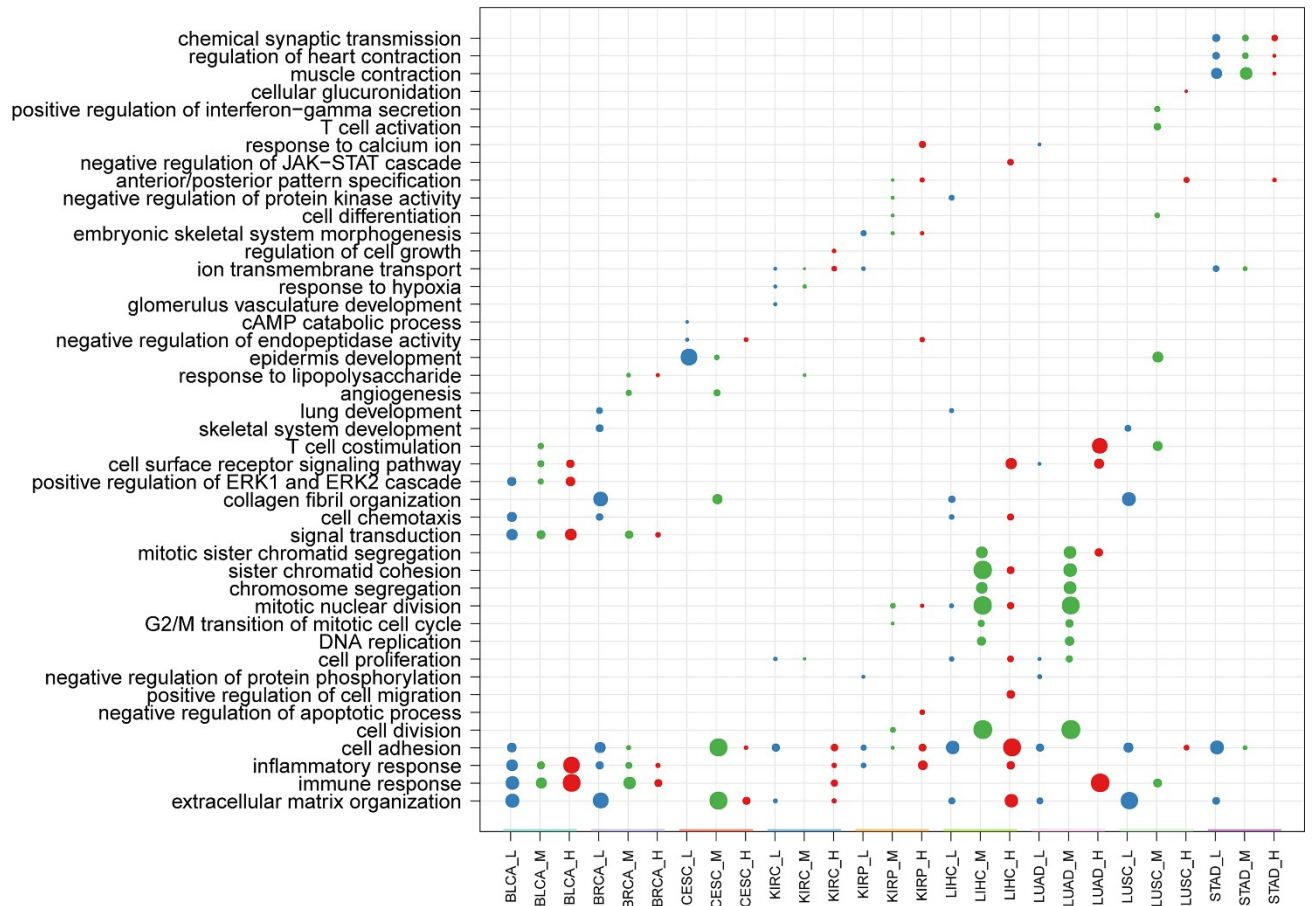

**Fig. S3. Functional enrichment of lncRNAs in different groups.** Blue, low dosage sensitivity score group. Green, medium dosage sensitivity score group. Red, high dosage sensitivity score group. Dot size represents the log<sub>2</sub>-transformed P-value calculated by the hypergeometric test.

## Supplementary Tables Legends

**Table S1. The number of lncRNAs contained in high and low regulatory groups**

| Group                 | Number of lncRNAs in the group | Number of cancer related lncRNAs | Number of non-cancer related lncRNAs |
|-----------------------|--------------------------------|----------------------------------|--------------------------------------|
| High regulatory group | 886                            | 34                               | 852                                  |
| Low regulatory group  | 4960                           | 10                               | 4950                                 |
| Total                 | 5846                           | 44                               | 5802                                 |

**Table S2. MiRNAs and TFs in 3 hub-networks**

| Hub        | Related-cancer   | PMID     |
|------------|------------------|----------|
| miR-16-5p  | Multiple cancers | 19903841 |
| miR-15a-5p |                  | 19549910 |

|                          |                                               |                                  |
|--------------------------|-----------------------------------------------|----------------------------------|
| miR-15b-5p               | Prostate adenocarcinoma<br>Glioma             | 29363862<br>24995320             |
| miR-195-5p<br>miR-497-5p | Multiple cancers                              | 28529562<br>24909281<br>23544130 |
| miR-424-5p               | Cervical cancer                               | 28082020                         |
| ZBTB33                   | Multiple cancers                              | 27694442                         |
| BHLHE40                  | Uterine Corpus Endometrial Carcinoma          | 26391953                         |
| IRF4                     | Peripheral T-cell lymphomas                   | 25833963                         |
| SUZ12                    | Bladder Urothelial Carcinoma                  | 26268246                         |
| SMAD7                    | Colorectal cancer                             | 28300830                         |
|                          | Liver hepatocellular carcinoma                | 28192402                         |
| PEG10                    | Pancreatic adenocarcinoma                     | 28193232                         |
|                          | Liver hepatocellular carcinoma                | 27370270                         |
| IGF1R                    | Stomach adenocarcinoma                        | 28223169                         |
|                          | Non-small-cell lung cancer                    | 20351332                         |
| E2F3                     | Glioma                                        | 25040912                         |
|                          | Lung cancers                                  | 16938365                         |
|                          | Stomach adenocarcinoma                        | 25871967                         |
| CBFB                     | Colorectal cancer                             | 19156145                         |
|                          | Leukemia                                      | 23979164                         |
| ERG                      | Prostate adenocarcinoma                       | 30042415                         |
|                          | Leukemia                                      | 23974202                         |
| TAF1                     | Multiple cancers                              | 27159579                         |
|                          | Cervical cancer and breast invasive carcinoma | 18684994                         |
| E2F4                     | Pancreatic adenocarcinoma                     | 28987387                         |
|                          | Bladder Urothelial Carcinoma                  | 26032289                         |
|                          | Breast invasive carcinoma                     | 25440089                         |
|                          | Multiple cancers                              | 30047092                         |
| CDX2                     | Colon adenocarcinoma                          | 26789870                         |
| HNF4A                    | Head and neck squamous cell carcinoma         | 28782802                         |
|                          | Kidney renal clear cell carcinoma             | 25961905                         |
|                          | Gastrointestinal cancer                       | 25488664                         |
